# Supplementary material for: A Sensitive Potentiometric Sensor for Isothermal Amplification-Coupled Detection of Nucleic Acids
Source: Sensors (Basel). 2018 Jul 14;18(7):2277. doi: 10.3390/s18072277 (PMC6068556; doi:10.3390/s18072277)

# A Sensitive Potentiometric Sensor for Isothermal Amplification-Coupled Detection of Nucleic Acids

Kang-Ho Lee <sup>1,†</sup>, Dongkyu Lee <sup>1,\*†</sup>, Jongsu Yoon <sup>1</sup>, Ohwon Kwon <sup>1</sup> and Jaejong Lee <sup>2,\*</sup>

<sup>1</sup> Daegu Research Center for Medical Devices, Korea Institute of Machinery and Materials, Daegu 42994, Korea; kangholee6@kimm.re.kr (K.-H.L.); jsyoon@kimm.re.kr (J.Y.); owkwon@kimm.re.kr (O.K.)

<sup>2</sup> Nano-Mechanical Systems, Korea Institute of Machinery and Materials, Daejeon 34103, Korea

\* Correspondence: dongkyu@kimm.re.kr (D.L.); jjlee@kimm.re.kr (J.L.)

† These authors contributed equally to this work.

## DNA Extraction Protocol

The microbe sample was separated using a centrifuge (at 8000 RPM for 5 min). The 200  $\mu$ L of tissue lysis buffer and 20  $\mu$ L of proteinase K (20 mg/mL) were added and reacted with the sample for 5 min in order to obtain a high molecular weight of Salmonella DNA, and then it was mixed with 50  $\mu$ L of magnetic bead solution (20 mg/mL) and 200  $\mu$ L of high purified ethanol. The 400  $\mu$ L of DNA binding buffer on magnetic beads was mixed with the solution. Two times of washing processes with 700  $\mu$ L of washing buffer I and II were followed to remove the proteins and impurities in the solution. The 400  $\mu$ L of elution buffer was added to collect the extracted target DNA.

**Figure S1.** Electropherograms of LAMP in the commercial or developed buffer.

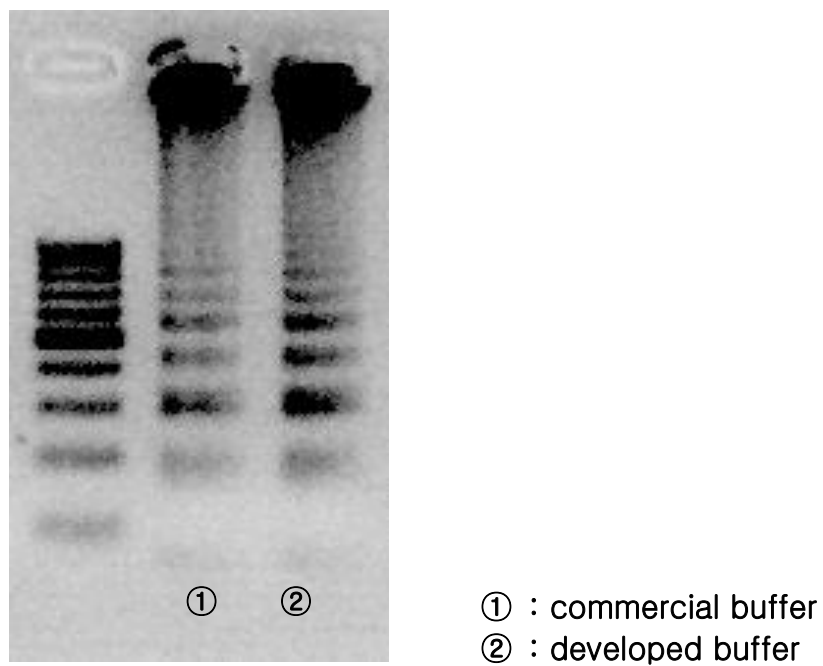

**Figure S2.** Temperature profiles after setting temperature at 65 °C.

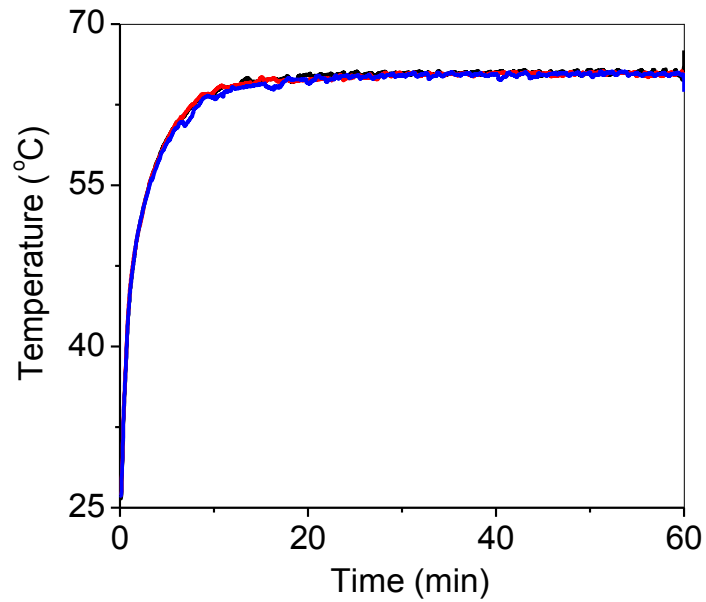

Supplement: Supplementary file 1 [file sensors-18-02277-s001.pdf]
